# Supplementary material for: Associations of Polymorphisms Localized in the 3′UTR Regions of the KRAS, NRAS, MAPK1 Genes with Laryngeal Squamous Cell Carcinoma
Source: MDPI journal article supplement (doi:10.3390/genes12111679), 2021-10-23
Supplement: s1 [file s1]

**Table S1.** Associations between *KRas* rs712 polymorphism and LSCC clinicopathological features.

| Parameter          | Genotype model      |                     |                     | Allelic model              |                            |
|--------------------|---------------------|---------------------|---------------------|----------------------------|----------------------------|
|                    | GG vs. GT and TT    | TT vs. GT and GG    | GT vs. GG and TT    | G carrier vs. G noncarrier | T carrier vs. T noncarrier |
| Tumor stage        |                     |                     |                     |                            |                            |
| T1 and T2          | 52.3 % vs. 54.1 %   | 46.7 % vs. 55.1 %   | 57.0 % vs. 50.3 %   | 55.1 % vs. 46.7 %          | 54.1 % vs. 52.3 %          |
| T3 and T4          | 47.7 % vs. 45.7 %   | 53.3 % vs. 44.9 %   | 43.0 % vs. 49.7 %   | 44.9 % vs. 53.3 %          | 45.1 % vs. 47.7 %          |
| OR (95% CI)        | 1.076 (0.679-1.706) | 1.400 (0.798-2.455) | 0.765 (0.494-1.182) | 1.400 (0.798-2.455)        | 0.929 (0.586-1.473)        |
| P-value            | 0.754               | 0.240               | 0.227               | 0.240                      | 0.754                      |
| Lymph node status  |                     |                     |                     |                            |                            |
| Positive           | 30.3 % vs. 24.3 %   | 28.3 % vs. 25.8 %   | 22.8 % vs. 29.6 %   | 25.8 % vs. 28.3 %          | 24.3 % vs. 30.3 %          |
| Negative           | 69.7 % vs. 75.7 %   | 71.7 % vs. 74.2 %   | 77.2 % vs. 70.4 %   | 74.2 % vs. 71.7 %          | 75.7 % vs. 69.7 %          |
| OR (95% CI)        | 1.352 (0.810-2.257) | 1.134 (0.607-2.119) | 0.702 (0.427-1.155) | 1.1374 (0.607-2.119)       | 0.740 (0.443-1.235)        |
| P-value            | 0.249               | 0.692               | 0.164               | 0.692                      | 0.249                      |
| Distant metastasis |                     |                     |                     |                            |                            |
| Positive           | 2.8 % vs. 3.2 %     | 3.3 % vs. 3.0 %     | 3.2 % vs. 3.0 %     | 3.0 % vs. 3.3 %            | 3.2 % vs. 2.8 %            |
| Negative           | 97.2 % vs. 96.8 %   | 96.7 % vs. 97.0 %   | 96.8 % vs. 97.0 %   | 97.0 % vs. 96.7 %          | 96.8 % vs. 97.2 %          |
| OR (95% CI)        | 0.853 (0.216-3.366) | 1.116 (0.231-5.395) | 1.072 (0.304-3.775) | 1.116 (0.231-5.95)         | 1.172 (0.297-4.624)        |
| P-value            | 0.821               | 0.891               | 0.914               | 0.891                      | 0.821                      |
| Grade              |                     |                     |                     |                            |                            |
| G1 and G2          | 88.1 % vs. 88.4 %   | 87.7 % vs. 89.1 %   | 89.8 % vs. 86.9 %   | 89.1 % vs. 84.7 %          | 88.4 % vs. 88.1 %          |
| G3                 | 11.9 % vs. 11.6 %   | 15.3 % vs. 10.9 %   | 10.2 % vs. 13.1 %   | 10.9 % vs. 15.3 %          | 11.6 % vs. 11.9 %          |
| OR (95% CI)        | 1.035 (0.507-2.112) | 1.471 (0.656-3.299) | 0.753 (0.380-1.493) | 1.471 (0.656-3.299)        | 0.967 (0.473-1.973)        |
| P-value            | 0.926               | 0.349               | 0.417               | 0.349                      | 0.926                      |

OR: Odds ratio; CI: confidence intervals.

**Table S2.** Associations between *KRas* rs61764370 polymorphism and LSCC clinicopathological features.

| Parameter          | Genotype model      |                  |                      | Allelic model              |                            |
|--------------------|---------------------|------------------|----------------------|----------------------------|----------------------------|
|                    | TT vs. TG and GG    | GG vs. TG and TT | TG vs. GG and TT     | T carrier vs. T noncarrier | G carrier vs. G noncarrier |
| Tumor stage        |                     |                  |                      |                            |                            |
| T1 and T2          | 52.5 % vs. 60.5 %   | 0.0 % vs. 53.5 % | 60.5 % vs. 52.5 %    | 53.5 % vs. 0.0 %           | 60.5 % vs. 52.5%           |
| T3 and T4          | 47,5 % vs. 39.5 %   | 0.0 % vs. 46.5 % | 39.5 % vs. 47.5 %    | 46.5 % vs. 0.0 %           | 39.5 % vs. 47.5 %          |
| OR (95% CI)        | 1.386 (0.720-2.666) | -                | 0.722 (0.375-1.388)  | -                          | 0.722 (0.375-1.388)        |
| P-value            | 0.328               | -                | 0.328                | -                          | 0.328                      |
| Lymph node status  |                     |                  |                      |                            |                            |
| Positive           | 63.7 % vs. 65.2 %   | 100 % vs. 63.8 % | 61.9 % vs. 64.2 %    | 63.4 % vs. 100 %           | 62.4 % vs. 64.1 %          |
| Negative           | 36.3 % vs. 36.8 %   | 0.0 % vs. 63.8 % | 38.1 % vs. 35.8 %    | 36.6 % vs. 0.0 %           | 37.6 % vs. 35.9 %          |
| OR (95% CI)        | 0.934 (0.589-1.482) | -                | 0.908 (0.567-1.456)  | -                          | 0,928 (0.580-1.485)        |
| P-value            | 0.772               | -                | 0.689                | -                          | 0.756                      |
| Distant metastasis |                     |                  |                      |                            |                            |
| Positive           | 2.5 % vs. 7.0 %     | 0.0 % vs. 3.1 %  | 7.0 % vs. 2.5 %      | 3.1 % vs. 0.0 %            | 7.0 % vs. 2.5 %            |
| Negative           | 97.5 % vs. 93.0 %   | 0.0 % vs. 96.9 % | 93.0 % vs. 97.5 %    | 96.9 % vs. 0.0 %           | 93.0 % vs. 97.5 %          |
| OR (95% CI)        | 0.337 (0.084-1.356) | -                | 2.968 (0.737-11.946) | -                          | 2.968 (0.737-11.946)       |
| P-value            | 0.126               | -                | 0.126                | -                          | 0.126                      |
| Grade              |                     |                  |                      |                            |                            |
| G1 and G2          | 88.7 % vs. 86.0 %   | 0.0 % vs. 88.3 % | 86.0 % vs. 14.0 %    | 88.3 % vs. 0.0 %           | 86.0 % vs. 88.7 %          |
| G3                 | 11.3 % vs. 14.0 %   | 0.0 % vs. 11.7 % | 88.7 % vs. 11.3 %    | 11.7 % vs. 0.0 %           | 14.0 % vs. 11.3 %          |
| OR (95% CI)        | 0.789 (0.309-2.016) | -                | 1.267 (0.496-3.236)  | -                          | 1.267 (0.496-3.236)        |
| P-value            | 0.621               | -                | 0.621                | -                          | 0.621                      |

OR: Odds ratio; CI: confidence intervals.

**Table S3.** Associations between *KRas* rs7973450 polymorphism and LSCC clinicopathological features.

| Parameter          | Genotype model      |                      |                     | Allelic model              |                            |
|--------------------|---------------------|----------------------|---------------------|----------------------------|----------------------------|
|                    | TT vs. TG and GG    | GG vs. TG and TT     | TG vs. GG and TT    | T carrier vs. T noncarrier | G carrier vs. G noncarrier |
| Tumor stage        |                     |                      |                     |                            |                            |
| T1 and T2          | 55.0 % vs. 51.5 %   | 50.0 % vs. 53.8 %    | 51.8 % vs. 54.5 %   | 53.8 % vs. 50.0 %          | 51.5 % vs. 55.0%           |
| T3 and T4          | 45.5 % vs. 48.5 %   | 50.0 % vs. 46.2 %    | 48.2 % vs. 45.5 %   | 46.2 % vs. 50.0 %          | 48.5 % vs. 45.0 %          |
| OR (95% CI)        | 0.869 (0.559-1.350) | 1.163 (0.489-2.764)  | 1.115 (0.707-1.758) | 0.860 (0.362-2.043)        | 1.151 (0.741-1.789)        |
| P-value            | 0.531               | 0.732                | 0.640               | 0.732                      | 0.531                      |
| Lymph node status  |                     |                      |                     |                            |                            |
| Positive           | 63.4 % vs. 64.5 %   | 68.8 % vs. 63.5 %    | 62.5 % vs. 64.6 %   | 63.1 % vs. 72.7 %          | 63.6 % vs. 64.1 %          |
| Negative           | 36.6 % vs. 35.5 %   | 31.2 % vs. 36.5 %    | 37.5 % vs. 35.4 %   | 36.9 % vs. 27.3 %          | 36.4 % vs. 35.9 %          |
| OR (95% CI)        | 0.953 (0.691-1.313) | 1.265 (0.673-2.380)  | 0.15 (0.656-1.277)  | 0.640 (0.346-1.186)        | 0.981 (0.711-1.352)        |
| P-value            | 0.768               | 0.466                | 0.601               | 0.156                      | 0.906                      |
| Distant metastasis |                     |                      |                     |                            |                            |
| Positive           | 2.1 % vs. 4.4 %     | 0.0 % vs. 3.1 %      | 4.4 % vs. 2.3 %     | 3.0 % vs. 4.5 %            | 4.4 % vs. 2.1 %            |
| Negative           | 97.9 % vs. 95.6 %   | 0.0 % vs. 96.9 %     | 95.6 % vs. 97.7 %   | 97.0 % vs. 95.5 %          | 95.6 % vs. 97.9 %          |
| OR (95% CI)        | 0.463 (0.128-1.675) | 1.589 (0.189-12.955) | 1.908 (0.541-6.735) | 0.639 (0.077-5.282)        | 2.158 (0.597-7.798)        |
| P-value            | 0.241               | 0.677                | 0.315               | 0.677                      | 0.241                      |
| Grade              |                     |                      |                     |                            |                            |
| G1 and G2          | 89.5 % vs. 86.6 %   | 81.0 % vs. 88.8 %    | 87.6 % vs. 12.4 %   | 88.8 % vs. 81.0 %          | 86.6 % vs. 89.5 %          |
| G3                 | 10.5 % vs. 13.4 %   | 19.0 % vs. 11.2      | 12.4 % vs. 11.3 %   | 11.2 % vs. 19.0 %          | 13.4 % vs. 10.5 %          |
| OR (95% CI)        | 0.754 (0.382-1.485) | 1.869 (1.594-5.878)  | 1.108 (0.549-2.237) | 0.535 (0.170-1.684)        | 1.327 (0.673-2.616)        |
| P-value            | 0.414               | 0.285                | 0.775               | 0.285                      | 0.414                      |

OR: Odds ratio; CI: confidence intervals.

**Table S4.** Associations between *NRas* rs14804 polymorphism and clinicopathological features

| Parameter          | Genotype model      |                                       |                      | Allelic model                         |                            |
|--------------------|---------------------|---------------------------------------|----------------------|---------------------------------------|----------------------------|
|                    | TT vs. CT and CC    | CC vs. CT and TT                      | CT vs. CC and TT     | T carrier vs. T noncarrier            | C carrier vs. C noncarrier |
| Tumor stage        |                     |                                       |                      |                                       |                            |
| T1 and T2          | 49.5 % vs. 58.7 %   | <b>83.3 % vs. 51.8 %<sup>1a</sup></b> | 55.2 % vs. 52.5 %    | <b>51.8 % vs. 83.3 %<sup>1b</sup></b> | 58.7 % vs. 49.5 %          |
| T3 and T4          | 50.5 % vs. 41.3 %   | <b>16.7 % vs. 48.2 %</b>              | 44.8 % vs. 47.5 %    | <b>48.2 % vs. 16.7 %</b>              | 41.3 % vs. 50.5 %          |
| OR (95% CI)        | 1.455 (0.936-2.261) | 0.215 (0.061-0.757)                   | 0.896 (0.573-1.402)  | 4.656 (1.321-16.407)                  | 0.687 (0.442-1.068)        |
| P-value            | 0.095               | <b>0.017<sup>1</sup></b>              | 0.631                | <b>0.017<sup>1</sup></b>              | 0.095                      |
| Lymph node status  |                     |                                       |                      |                                       |                            |
| Positive           | 61.2 % vs. 66.8 %   | 72.3 % vs. 63.2 %                     | 64.9 % vs. 63.2 %    | <b>62.8 % vs. 32.3 %<sup>1c</sup></b> | 66.0 % vs. 61.2 %          |
| Negative           | 38.8 % vs. 33.2 %   | 27.3 % vs. 36.8 %                     | 35.1 % vs. 36.8 %    | <b>37.2 % vs. 67.7 %</b>              | 34.0 % vs. 38.8 %          |
| OR (95% CI)        | 0.785 (0.572-1.079) | 1.521 (0.787-2.942)                   | 1.078 (0.780-1.489)  | 3.646 (2.334-9.249)                   | 1.232 (0.896-1.694)        |
| P-value            | 0.135               | 0.213                                 | 0.651                | <b>0.023<sup>1</sup></b>              | 0.200                      |
| Distant metastasis |                     |                                       |                      |                                       |                            |
| Positive           | 3.3 % vs. 2.8 %     | 0.0 % vs. 3.2 %                       | 3.2 % vs. 3.0 %      | 3.2 % vs. 0.0 %                       | 2.8 % vs. 3.3 %            |
| Negative           | 96.7 % vs. 97.2 %   | 100 % vs. 96.8 %                      | 96.8 % vs. 97.0 %    | 96.8 % vs. 100 %                      | 97.2 % vs. 96.7 %          |
| OR (95% CI)        | 1.171 (0.324-4.232) | -                                     | 1.080 (0.299-3.905)  | -                                     | 0.854 (0.236-3.084)        |
| P-value            | 0.809               | -                                     | 0.907                | -                                     | 0.809                      |
| Grade              |                     |                                       |                      |                                       |                            |
| G1 and G2          | 89.6 % vs. 86.6 %   | 83.3 % vs. 88.6 %                     | 87.1 % vs. 89.1 %    | 88.8 % vs. 83.3 %                     | 86.6 % vs. 89.6 %          |
| G3                 | 10.4 % vs. 13.4 %   | 16.7 % vs. 11.4 %                     | 12.9 % vs. 10.9 %    | 11.4 % vs. 16.7 %                     | 13.4 % vs. 10.4 %          |
| OR (95% CI)        | 0.750 (0.381-1.477) | 1.554 (0.428-5.638)                   | 01.205 (0.607-2.396) | 0.502 (0.177-2.334)                   | 1.333 (0.677-2.625)        |
| P-value            | 0.405               | 0.502                                 | 0.594                | 0.502                                 | 0.405                      |

<sup>1</sup>Significant; <sup>a</sup>Fisher's exact test; P=0.009; <sup>b</sup>Fisher's exact test, P=0.013; <sup>c</sup>Fisher's exact test, P=0.0012 OR: Odds ratio; CI: confidence intervals.

**Table S5.** Associations between *MAPK1* rs9340 polymorphism and LSSC clinicopathological features

| Parameter          | Genotype model      |                                      |                      | Allelic model              |                            |
|--------------------|---------------------|--------------------------------------|----------------------|----------------------------|----------------------------|
|                    | CC vs. CT and TT    | TT vs. CT and CC                     | CT vs. CC and TT     | C carrier vs. C noncarrier | T carrier vs. T noncarrier |
| Tumor stage        |                     |                                      |                      |                            |                            |
| T1 and T2          | 54.1 % vs. 53.2 %   | 57.4 % vs. 52.7 %                    | 51.8 % vs. 55.2 %    | 52.7 % vs. 57.4 %          | 53.2 % vs. 54.1 %          |
| T3 and T4          | 45.9 % vs. 46.8 %   | 42.6 % vs. 47.3 %                    | 48.2 % vs. 44.8 %    | 47.3 % vs. 42.6 %          | 46.8 % vs. 45.9 %          |
| OR (95% CI)        | 1.964 (0.608-1.529) | 0.828 (0.459-1.493)                  | 1.146 (0.742-1.770)  | 1.207 (0.670-2.177)        | 1.038 (0.654-1.646)        |
| P-value            | 0.875               | 0.531                                | 0.539                | 0.531                      | 0.875                      |
| Lymph node status  |                     |                                      |                      |                            |                            |
| Positive           | 62.1 % vs. 64.7 %   | 60.9 % vs. 64.5 %                    | 65.3 % vs. 62.5 %    | 64.0 % vs. 60.9 %          | 64.1 % vs. 62.1 %          |
| Negative           | 37.9 % vs. 35.3 %   | 39.1 % vs. 35.5 %                    | 34.7 % vs. 37.5 %    | 36.0 % vs. 39.1 %          | 35.9 % vs. 37.9 %          |
| OR (95% CI)        | 0.894 (0.637-1.253) | 0.856 (0.567-1.294)                  | 1.129 (0.823-1.549)  | 1.145 (0.757-1.731)        | 1.092 (0.779-1.532)        |
| P-value            | 0.515               | 0.462                                | 0.451                | 0.522                      | 0.609                      |
| Distant metastasis |                     |                                      |                      |                            |                            |
| Positive           | 0.9 % vs. 4.1 %     | <b>14.8 % vs. 0.7 %<sup>1a</sup></b> | 4.9 % vs. 1.2 %      | 3.3 % vs. 1.9 %            | 4.1 % vs. 0.9 %            |
| Negative           | 99.1 % vs. 95.9 %   | <b>85.2 % vs. 99.3 %</b>             | 95.1 % vs. 98.8 %    | 96.7 % vs. 98.1 %          | 95.9 % vs. 99.1 %          |
| OR (95% CI)        | 0.215 (0.027-1.719) | 4.553 (1.069-8.461)                  | 4.128 (0.863-19.746) | 1.807 (0.224-14.563)       | 4.651 (0.582-37.189)       |
| P-value            | 0.147               | <b>0.041<sup>1</sup></b>             | 0.156                | 0.579                      | 0.147                      |
| Grade              |                     |                                      |                      |                            |                            |
| G1 and G2          | 85.3 % vs. 89.8 %   | 88.7 % vs. 88.2 %                    | 90.2 % vs. 86.4 %    | 88.2 % vs. 88.7 %          | 89.8 % vs. 85.3 %          |
| G3                 | 14.7 % vs. 10.2 %   | 11.3 % vs. 11.8 %                    | 9.8 % vs. 13.6 %     | 11.8 % vs. 11.3 %          | 10.2 % vs. 14.7 %          |
| OR (95% CI)        | 1.517 (0.761-3.024) | 0.957 (0.379-2.418)                  | 0.693 (0.349-1.373)  | 1.044 (0.414-2.637)        | 0.659 (0.331-1.314)        |
| P-value            | 0.236               | 0.927                                | 0.693                | 0.927                      | 0.236                      |

\*Significant; <sup>a</sup>Fisher's exact test, P=0.005; OR: Odds ratio; CI: confidence intervals.

**Table S6.** Association between *KRas* rs712 and rs7973450 polymorphisms in haplotype models and LSCC clinicopathologic features

| Parameter          | Haplotype model                                           |                                                           |                                                           |
|--------------------|-----------------------------------------------------------|-----------------------------------------------------------|-----------------------------------------------------------|
|                    | TG haplotype carriers <i>vs.</i> TG haplotype noncarriers | GT haplotype carriers <i>vs.</i> GT haplotype noncarriers | TT haplotype carriers <i>vs.</i> TT haplotype noncarriers |
| Tumor stage        |                                                           |                                                           |                                                           |
| T1 and T2          | 51.5 % <i>vs.</i> 54.9 %                                  | 54.9 % <i>vs.</i> 47.5 %                                  | 54.6 % <i>vs.</i> 51.9 %                                  |
| T3 and T4          | 48.5 % <i>vs.</i> 45.1 %                                  | 45.1 % <i>vs.</i> 52.5 %                                  | 45.4 % <i>vs.</i> 48.1 %                                  |
| OR (95% CI)        | 1.144 (0.735-1.782)                                       | 1.343 (0.769-2.345)                                       | 0.898 (0.576-1.399)                                       |
| P-value            | 0.551                                                     | 0.300                                                     | 0.634                                                     |
| Lymph node status  |                                                           |                                                           |                                                           |
| Positive           | <b>45.8 % <i>vs.</i> 26.7 %<sup>1a</sup></b>              | 25.9 % <i>vs.</i> 27.9 %                                  | 23.5 % <i>vs.</i> 30.5 %                                  |
| Negative           | <b>54.2 % <i>vs.</i> 73.3 %</b>                           | 72.1 % <i>vs.</i> 72.1 %                                  | 76.5 % <i>vs.</i> 69.5 %                                  |
| OR (95% CI)        | 3.954 (2.577-6.578)                                       | 1.103 (0.591-2.057)                                       | 0.698 (0.424-1.147)                                       |
| P-value            | <b>0.015<sup>1</sup></b>                                  | 0.758                                                     | 0.156                                                     |
| Distant metastasis |                                                           |                                                           |                                                           |
| Positive           | 4.5 % <i>vs.</i> 2.1 %                                    | 3.0 % <i>vs.</i> 3.3 %                                    | 3.1 % <i>vs.</i> 3.1 %                                    |
| Negative           | 95.5 % <i>vs.</i> 97.9 %                                  | 97.0 % <i>vs.</i> 96.7 %                                  | 96.9 % <i>vs.</i> 96.9 %                                  |
| OR (95% CI)        | 2.274 (0.629-8.219)                                       | 1.093 (0.226-5.282)                                       | 1.003 (0.277-3.624)                                       |
| P-value            | 0.210                                                     | 0.912                                                     | 0.997                                                     |
| Grade              |                                                           |                                                           |                                                           |
| G1 and G2          | 87.7 % <i>vs.</i> 88.7 %                                  | 89.1 % <i>vs.</i> 85.0 %                                  | 89.2 % <i>vs.</i> 86.9 %                                  |
| G3                 | 12.3 % <i>vs.</i> 11.3 %                                  | 10.9 % <i>vs.</i> 15.0 %                                  | 10.8 % <i>vs.</i> 13.1 %                                  |
| OR (95% CI)        | 1.104 (0.556-2.192)                                       | 1.436 (0.641-3.218)                                       | 0.802 (0.406-1.586)                                       |
| P-value            | 0.778                                                     | 0.379                                                     | 0.526                                                     |

<sup>1</sup>Significant; <sup>a</sup>Fisher's exact test, P=0.025; OR: Odds ratio; CI: confidence intervals.
